# Supplementary material for: Diffuse X-ray scattering from correlated motions in a protein crystal
Source: PubMed Central journal article supplement (PMC7062842; doi:10.1038/s41467-020-14933-6), 2020-03-09
Supplement: 41467_2020_14933_MOESM3_ESM.pdf [file 41467_2020_14933_MOESM3_ESM.pdf]

## Description of Additional Supplementary Files

File Name: Supplementary Movie 1

Description: Variational diffuse intensity in the  $\mathbf{a}^*-\mathbf{b}^*$  plane (constant Miller index  $l$ , shown in lower right). The intensity scale is the same as in Fig. 1C in the Main Text.

File Name: Supplementary Movie 2

Description: Acoustic vibrations of triclinic lysozyme according to the lattice dynamics model refined using diffuse scattering. The animation shows three acoustic modes with different polarization directions,  $\hat{\mathbf{p}}$  (two polarized mostly transverse and one longitudinal) for the wavevector  $\mathbf{k} = \mathbf{a}^*/13$  (the  $\Gamma$ -M direction in Supplementary Table 3 and Supplementary Fig. 15). To aid in visualizing the small motions, the vibrational amplitudes were multiplied by 100 and the frequencies were set to  $\nu \sim 1\text{s}^{-1}$ .
